# Supplementary material for: MYB80 homologues in Arabidopsis, cotton and Brassica: regulation and functional conservation in tapetal and pollen development
Source: PubMed Central journal article supplement (PMC4205283; doi:10.1186/s12870-014-0278-3), 2014-10-14
Supplement: 12870_2014_278_MOESM1_ESM.pdf [file 12870_2014_278_MOESM1_ESM.pdf]

AtMYB80 (1) -ATCGATATTCAAAGTTGTGTAATAATGTGGATTACCACTACTTGTTTACAACAAAAGATG  
BnMYB80A (1) -----  
BnMYB80C (1) -----T-CACGTGG  
GhMYB80-1 (1) AAACCCTATTTTAACGTAAATAAATCTAATGGAAAAGTATTTTCGTAACAA--AACGATA

AtMYB80 (60) ACACAAGTAGGGTCTTCGTTGATTTAGAACAAAAGGTACAAGTT--CGTACCGGAAAAG  
BnMYB80A (1) -----GAATTCAGATTAGGAA-TAC--GTT--CGTACCGGGTAGGG  
BnMYB80C (9) GGGTCCTGTAAATTGACTCGGAAAGTCTCAAACGTAAATGC--GTT--CGTCCGCGAAAAG  
GhMYB80-1 (59) ACGTGACTAAAATGTAACATTTCAACATAAAGTGGCTAAAAATTAACTTGAGGCAACAA

AtMYB80 (118) GTACTTCTACAA-GAATCTGTGCTTTTCACGAATGCTCTCATAGTCTC-ACAAATGCACA  
BnMYB80A (37) A-----CGAAAG-GAAAGGGTACATGTCTT-GAGATTTTTCGTAACAACGACTGCTCA  
BnMYB80C (65) A-----CAA-----GAAACGGTACTTTGTATAAGATTCTCTCTGTTTTCATGAAATGCACA  
GhMYB80-1 (119) AAATGACTATTTTGAATAGTTTACCCTTTTTTTACCGTTAAAAATTGATCCCTATATATC

AtMYB80 (176) CGAACGCTTTCGCAATATCTCTCGTACTTGTGCGGTA----CTTCACGAATACATTCCTT  
BnMYB80A (90) TTAATTCGCC--ACAACTACGCCCT-----CGAA----TCTCAT-AATAATTCCTCGTA  
BnMYB80C (116) CGTACGCCCTCGAGACATCTCCAT-----GCG-----CACCAA-GATATT-TCCTTA  
GhMYB80-1 (179) AGCATTAGGT--ATACGTAGCACATCATATGTGGTTATTCCGTCAAGTCACTT-AAATTTT

AtMYB80 (232) ACAAATGAAAAA--GTTGTCAAACTTTTAAAAA--CGTGTCAATACATTCCTT  
BnMYB80A (136) CATCAC-GAAGACATA-CATTCTCTTACAAAAGGACAGGACATTTGTC-AACATCAGT  
BnMYB80C (163) GAAAAAGAAATATGCATCAATAAAGTTCGAGTTTAAATACTTTGCAAAAAA--AACTCCAGT  
GhMYB80-1 (236) TAATAGTAAAAATGATGAAGTGAACAATTTTCTTAAATTAATGTACATTGACTAAT

AtMYB80 (290) ATGATCACAAATTAT--ATTAAAAAGAGTACAATTTTCACTTTCATAATCCAAGGCTAGT  
BnMYB80A (193) GT---CACAG-TTAT--ATAAATCTA---TAAGAGCTCAACTTATA-----  
BnMYB80C (222) CT--AACAA-TTAT--ATAAACCTA---TAATATCTCAATTTATAATAATGATTCAAC  
GhMYB80-1 (296) TTG--CACATTTTATGAATAAAAGACAATACAAATTT-AACTCTAATATATGAGTCAAC

AtMYB80 (348) TTGTTATCCAAGTCTTCTACCAATCCCAAAATGTTTAAAAGTTGGAGTTTGCATAGAG  
(231) ---TCAT-----GTT-AT--AATG-----  
BnMYB80C (273) CCTAAT-----GTT-AA--ACTGCCAAAATTTATTGT--TGCGTAGAT-AATATTT  
GhMYB80-1 (353) GCGTACTTTTACCAAAAATAGTACGTGGGGTGATT-TAA--GACAAAGC-CACACGT

AtMYB80 (408) AATATCAGAAATTTATATAATCTAACTGTAAATAATGA--AGAATATAATTTTATGG  
BnMYB80A (244) -----TAACTAATTTATTTT-TGGGTGAAATTCGATAA-TACGATTTGAAAAAG--  
BnMYB80C (320) CACAGAAATTTATTTATGTT-TGGGTGAAATTCGATAAATACAATATGAAAAAAGAA  
GhMYB80-1 (409) GGAAGTTGAAACATTTGGAAGGGCTGTAAAGTAA-TGATATGA-TGAAATCTGAAAGAATG--

AtMYB80 (466) TGAATAATCTGAATGTAAAAGGAGTGTGACCAAGCGTGTGAGTGGGTGACCTACCGGCTTAA  
BnMYB80A (292) TG-----CGATATACAAGGAGTGTGACCAAGCGTAGGGTGGGTGACCTACCGGCCAAA  
BnMYB80C (379) TGATGAAAATGGATATACAAGGAGTGTGACCAAGCGTAGAGTGGGTGAACTACCGGCCAAA  
GhMYB80-1 (465) TCA-----AAGAAGAGAAGAGTGTGACCGGCGTCTTGAGGGTGGGTGACCTACCGGCCAAT

AtMYB80 (526) GGGAAATCACACGCTCTGTAGCGTTGAATTTCTTTAAGAGTTTAAATCAA--TTCATGCA--  
BnMYB80A (344) GGGAAATCACACGCTCTGTAGCGTTGAATTTCTTTATAGAGTTTAAATCAC--TTCATGCA--  
BnMYB80C (439) GGGAAATCACACGCTCTGTAGCGTTGAATTTCTTTACAGAGTTTAAATCAC--TTCATGCA--  
GhMYB80-1 (517) CC--TTCACACACTCAACAGCGTTGAATTTCTTTATAAACTCAATGCACATTGATGGATG

AtMYB80 (582) -CATCTGATGCTAATTTTACTATGTTTTCATTTTGTAAATCAATTTTATTATATATA  
BnMYB80A (400) -CATTTGATGCTAATTTTCACT---GTTTAAATCTT-----TTATAAG---TA  
BnMYB80C (495) -CATTTGATGCTAATTTTCACT---GTTTCAATTTTGT-----TTATTATA--TA  
GhMYB80-1 (575) TCTTTTTCATGCATATATGCAATATCTTTCCTCCCTTTGTATAATAA---ATAATATACCTT

AtMYB80 (641) TACATACATTTCTTTCTTCTTTGCAATTTAAAAG-----CCTTGATTACAAGA  
BnMYB80A (441) TGCATACATTTTCTTTCTTCTTCAATTTAATAG-----TCTCGATTACAAGA  
BnMYB80C (539) TATACACATTTTCTTTCTTCTTCAATTTAAAAG-----CCACGATTACAAGA  
GhMYB80-1 (631) AACAAATAAAATGTACACCCCAAACAATTTCTCACTTCCCCCGCCCTTTTTTCTTTA

AtMYB80 (691) AAGTACAAAAATCAAAAGTTGGCAG--TTTTAATCTTTGGTGGGCAATCTTTGATAT  
BnMYB80A (491) AAACAAAGAAATTAAGTTTGGTAG--TTTTGATCTTTTGG---GCAATCTTTGATTT  
BnMYB80C (589) AAACAAAGAAATTAAGTTTGGCAG--TTTTAATCTTTTGG---GCAATCTTTGATTT  
GhMYB80-1 (691) TTTCCGACCTCATCAAAGTTTTTAAAGCTATACTAGCTGTAGCACAAAGAAGCACTCAGCC

AtMYB80 (749) ATATAAGTTTTTTTCAATTTCTAACCAAAATTTCTTTTTTCTCGTTAG--TAAATTAAGT  
BnMYB80A (545) ATCTC---TTTTTCATCTCTTACCAAAATTTCTTTTGTTCCTGTGCTGAATTAAT  
BnMYB80C (643) ATCTC---TTTTT---TTC-----TTT-CTTGATGATCAGTA-----AATTAAT  
GhMYB80-1 (751) ATTTGCG---TTTTTCTTTTCTTTTAAATTTTTCCTAATTTGTTGCCGAG--TCTTTAAAC

AtMYB80 (807) AAAGAGTAATCAAATCTATCAAGAGATAAAAACTAGAAAGAAAGAAAGAAAGAAATGGGTC  
BnMYB80A (601) AAAGAAAAATCGATTTTCTTTTCGAGATAAAAACTAGAAAGAAAGAAAGAAAGAAATGGGTC  
BnMYB80C (680) AAAGAGAGA-CGATCGA-----GAGATAAAAACTAGAAAG-----AAAGA-ATGGGTA  
GhMYB80-1 (806) TTATTTTAGCATTTAATTT--GTCATGGAA--TAAAAGTGTAAATAAAAAAATGGGTC

AtMYB80 (867) GGATTCCATGTTGTGAAAAGGAGAATGTGAAAGAGAGCAATGGACTCCTGAAAGAAGACA  
BnMYB80A (660) GGATTCCATGTTGTGAAAAGGAGAATGTGAAAGAGAGCAATGGACTCCTGAAAGAAGACA  
BnMYB80C (726) GGATTCCATGCTGTGAAAAGGAGAATGTGAAAGAGAGCAATGGACTCCTGAAAGAAGACA

GhMYB80-1 (862) GGATTCATGTTGTGAGAAAGACAATGTTAAAAGAGGACAGTGGACACCCGAGGAAGACA

AtMYB80 (927) ACAAATGGCTTCTTATATTGCTCAACATGGTACTCGTAATTGGCGTCTCATCCCTAAAGA  
BnMYB80A (720) ACAAATGGCTTCTTACATTGCTCAACACGGTACTCGTAATTGGCGTCTCATCCCTAAAA  
BnMYB80C (786) ACAAATGGCTTCTTACATTGCTCAACATGGTACTCGTAATTGGCGTCTCATCCCTAAAA  
GhMYB80-1 (922) ACAAGCTCTCTCTTACATTGCTCAACATGGCACCCGCAATTGGCGTCTCATCCCAAGA

AtMYB80 (987) ATGCTGGTAATTTAAATTTTCTCTATATTTTITTAATG-----TTTAT-----  
BnMYB80A (780) ACGCTGGTAAATTAATTTGCACT-TCTTTAATCAAGTAGGAATAGTCTTATAAAGATCT  
BnMYB80C (846) ACGCTGGTATATTTAATTTTCACT-TTTTTC-TAAAATA-----TTAT-----  
GhMYB80-1 (982) ATGCTGGTCTGTGT--TTTGTCT-TATCAC-CCTAATA-----TCCAATG-----

AtMYB80 (1032) -----TAGTCAAGTGA TCA-----TTGT  
BnMYB80A (839) GATTA TCCATCACTCTCTGAAATATTTCAAGACAAACTTTTAAAACAACAATGTTTGT  
BnMYB80C (887) -----TTCTTTAGTCTAGT-AAATAT-----AATGAT-GT  
GhMYB80-1 (1024) -----CCATTGGATTGCAATGCA-----ATTGT

AtMYB80 (1051) -----AATTAATATA---ATGAATCGACAAATTTGGT-----C--  
BnMYB80A (899) AAAAGGTAAAGATTGTTTATAATGTACATACATAAATAGG--CTGGTGAAA-ATTT  
BnMYB80C (914) ---GGTCTA-ATTTG-FTTGAGCTGTATTAATGATCGGTGAAACCTGGT-----TGT  
GhMYB80-1 (1047) -----GTTATTTTGTGTTT---AAAAGTAAAAGAAATGGGTGGGGATGA

AtMYB80 (1083) -TTTAA TAGGGTTGCAAAAGATGTGGGAAAGAGTGTAGGCTCGATGGACAAACTATCTGC  
BnMYB80A (956) GTTTTGTAGGATTGCAAGATGTGGGAAAGAGTGTAGACTAAGATGGACGAACATTTGC  
BnMYB80C (963) TATATA TAGGATTGCAAGATGTGGGAAAGAGTGTAGACTACGGTGGACAAACTATTTGC  
GhMYB80-1 (1094) TTTTGT TAGGCTCTCAAAGATGTGGGAAAAGCTGCCGATTGCGATGGACTAATTACCCTC

AtMYB80 (1142) GTCCGATTGAAACATGGCCAGTTCCTCGGAGGCTGAAGAACATATCATTGTCAAGTTTC  
BnMYB80A (1016) GTCCGACCTGAAACACGGACAGTTTCAGACGCTGAAGAACATATCATTGTCAAGTTTC  
BnMYB80C (1023) GTCCGACCTGAAACATGGTCAATTTCTGAGGCTGAAGAACATATCATTGTCAAGTTTC  
GhMYB80-1 (1154) GGCCGACCTTAAACATGGCCAGTTCCTCAATGCTGAGGAGCAAACTATTGTGAAGCTCC

AtMYB80 (1202) ACTCTGTTCTTGGTAACCGGTATGATCACTACTACTAGATCTAAATTAAC TACGGT TTA  
BnMYB80A (1076) ACTCTGTTCTTGGTAACAGGTATGACTCTTAAATACAACTCCTCTCTTAAGAA TCAATAAA  
BnMYB80C (1083) ACTCTGTTCTTGGTAACCGGTATGACTCTTTATA-----TGTATGTACCA-----  
GhMYB80-1 (1214) ATTCTGTTGTTGGCAACCGGTA-----

AtMYB80 (1262) TGATTTTCTTAAAAGATTTAATCTAGGTGTATAAATTACAGATGGACTCAATAAATATCG  
BnMYB80A (1136) ATTTCTGTTACGTCA-----TTTCTGGGATGTGAAAATTATGGATAGACTAA--AGTGGCC  
BnMYB80C (1130) -----TACCTCA-----TTAC---GGCCTTCAAACCTTTC-ATACA TCA--ATTTCT  
GhMYB80-1 (1236) -----

AtMYB80 (1322) GGTTCCTTACTAAGTTTGTGA-AATT TTGATGCT-GACTTACTGATGAATTGTTTAT  
BnMYB80A (1190) TGTTTTAAATAAATAATATTATGCAATATGATAGTCTCCAGACTGTTCAA AAAAAGACGT  
BnMYB80C (1173) TGAAATCCAT--TTCTTTGGGATATTTAAGAAAGT-TACAGATAGACTCAAACAGGGCGG  
GhMYB80-1 (1236) -----ACAAA CCGTAAACAATG-----

AtMYB80 (1380) GAGTTT TTTGACAAGTTCTTTGGGACACAAGAACTGAATAAG-----ACATA  
BnMYB80A (1250) GATGAGAACTCTCACAAGTCTTTGGGACAAGAACTGAATAATCGATCTAAC TTTAGCAGG  
BnMYB80C (1230) GGTTTGT-TCTTATTCTGTTTGG-----ATTTGATTAT--ATC--ATTTGTCACACA  
GhMYB80-1 (1254) G-----CTTCC TTAG-----ACA

AtMYB80 (1428) AGTTT-TGTTCTATATAC-----CATAAATCCAAATCTAAGTAT--A-----GG-T  
BnMYB80A (1310) AATTGCTGTTATATATAC TTAAC TACAGAGTTAATT TTTGACTCTAAATGAAATGCTT  
BnMYB80C (1278) AGTTTCT-TGGGAAACAAGAAAC--AGAA--TAAGACGTAAACCT-----TGCTT  
GhMYB80-1 (1267) AGACT-----A-----G--ATAAAATGCCA CCGT-----A

AtMYB80 (1471) TTTAAACTTTGGGAAC T-----TATA-ATTTCTATAA--AATTTGTTTTCGACTCATAA  
BnMYB80A (1370) CTCTAACACTATTTGACTCAGAAACTAAAGGTTGTAATCAAAAGTTCCAAAAA AACAAAA  
BnMYB80C (1323) TATATAACAGGTTCACTC-----TAGAT-TTCTAAT--ATTTCGAGAAGTTCTTCA  
GhMYB80-1 (1290) TTTCAAGC--TT--C-----TTTGT T-----

AtMYB80 (1523) A---TAGAGTTTGTAT-GATGTATGCTGATGAATAGTCTGGGATT-TTTCATGAGAAACA  
BnMYB80A (1430) AATCTAAAGTTGAAAGATGCT-GATGATA--TTATATGTTTATTTCCAAAGAGCA  
BnMYB80C (1373) ---TAAAGTTTGAATAATATATAGCTGATC--GT--TGGATTATTTCCAAAGAGCA  
GhMYB80-1 (1308) -----GTTTTA---TA--GCTCAT-----GTTTT-----GGGA

AtMYB80 (1578) ACAGTTAACATCTTTCTTG-----GG--AAACAT---TT  
BnMYB80A (1487) ATAGTTAGCAAAA TTTCTGAGGAACAAGAAAGTGAATAAGAAA GACATAAACCTTGCCTTA  
BnMYB80C (1424) ATAGTTAGCAAGAATT-----GAATAA---GACATCAACCTTATTT  
GhMYB80-1 (1332) TTAGCTATTAAC TTTG-----TC---TA

AtMYB80 (1607) AATAA TCTTTTGACATATA---TGCTTCAGTGGTCTTGATTGCGGCGCAACTTCTCG  
BnMYB80A (1547) AGT TTTCTTTTGACGTATATGCA TGGTTCAGTGGTCTTGATTGCGGCGCACTTCCAG  
BnMYB80C (1463) AAT TTTCTTTTGACCTATA---TGCTTCAGTGGTCTTGATTGCGGCGCACTTCTCG  
GhMYB80-1 (1352) A--A---TTTGTAC CACA-----TTGCAGCTGGTCTTGATTGCGAGCACAGTTACCTG

AtMYB80 (1663) GTCGACAGACAACGATGTGAAAAA TTTATTGGAACACGAAAGCTGAAGAAGAAGTTGTCAG  
BnMYB80A (1607) GTCGAACAGACAACGATGTGAAAAA TTTATTGGAACACGAAAGCTGAAGAAGAAGTTGTCAG  
BnMYB80C (1519) GTCGAACAGACAACGATGTGAAAAA TTTATTGGAACACGAAAGCTGAAGAAGAAGTTGTCAG  
GhMYB80-1 (1400) GTCGACAGACAATGATGTTAAAAA TTTATTGGAACACGAAAGCTGAAGAAGAAGCTTTGAG

|           |        |                                                                                                                           |
|-----------|--------|---------------------------------------------------------------------------------------------------------------------------|
| AtMYB80   | (1723) | <u>GAATGGGAATAGATCCGGTGACC</u> <u>CACAAGCCTTTCTCGCAT</u> <u>CTAATGGCAGAGATCA</u> <u>CCA</u>                               |
| BnMYB80A  | (1667) | <u>GAATGGGGATAGATCCAGTTACT</u> <u>CACAAGCCTTTCTCGCACCT</u> <u>AATGGCAGAGATCA</u> <u>CCA</u>                               |
| BnMYB80C  | (1579) | <u>GAATGGGAATAGATCCCGTAAC</u> <u>CACAAGCCTTTCTCGCAT</u> <u>CTAATGGCAGAGATAA</u> <u>CCA</u>                                |
| GhMYB80-1 | (1460) | <u>GCATGGGTATCGATCCTGTGACA</u> <u>CACAAGCCTTTCTCTCACCT</u> <u>CATGGCTGAGATAG</u> <u>CCA</u>                               |
| AtMYB80   | (1783) | <u>CTACACTTAATCCTCCTCAGGT</u> <u>TCTCACCTAGCCGAAGCTGC</u> <u>CTCGGCTGTTTCAAGG</u>                                         |
| BnMYB80A  | (1727) | <u>CTACACTCAAACCTCCCCAGTCTCT</u> <u>CACCTGCTGAAGCTGCACT</u> <u>CGGTTGTTTCAAGG</u>                                         |
| BnMYB80C  | (1639) | <u>CTACACTCAATCCTCCTCAAGTCTCA</u> <u>CACCTGCTGAAGCTGC</u> <u>CTCGGATGTTTCAAGG</u>                                         |
| GhMYB80-1 | (1520) | <u>CTACATTGGCAACACCGCAGGTGGCT</u> <u>CATTTAGCTGAAGCGCACT</u> <u>AGGGTGTTTCAAGG</u>                                        |
| AtMYB80   | (1843) | <u>ACGAGATGCTTCACTTGCTCAC</u> <u>CAAGAAACGTGTGACC</u> <u>TAAACCAAATCAACTTT</u> <u>TCAA</u>                                |
| BnMYB80A  | (1787) | <u>ACGAGATGCTTCACTTGCTCAC</u> <u>CAAGAAACGTGTGACC</u> <u>TAAACCAAATCAACTTT</u> <u>TCAA</u>                                |
| BnMYB80C  | (1699) | <u>ACGAGATGCTTCACTTGCTCAC</u> <u>CAAGAAACGTGTGACT</u> <u>TAAACCAAATCAACTTT</u> <u>TC</u> <u>CCA</u>                       |
| GhMYB80-1 | (1580) | <u>ATGAAATGCTCCACC</u> <u>TGCTAACTAAGAAACGTATCGA</u> <u>TTCCAGCT--TCAACAAT</u> <u>CAA</u>                                 |
| AtMYB80   | (1903) | <u>ACCATAACCT</u> <u>-----AACCCAAACAACCTTT</u> <u>CACGAGAT</u> <u>---</u> <u>GCTGATAATGA</u> <u>-----</u>                 |
| BnMYB80A  | (1847) | <u>GCCCTAACCATAACCAT</u> <u>AACCTTAACCAACTTT</u> <u>AACCAACT</u> <u>--</u> <u>GTTGATAACGA</u> <u>-----</u>                |
| BnMYB80C  | (1759) | <u>GCCCTAAC</u> <u>-----CTAACCACTTT</u> <u>ACCGAAC</u> <u>--</u> <u>GTTGATAGCGA</u> <u>-----</u>                          |
| GhMYB80-1 | (1638) | <u>TCCGGGACAA</u> <u>GGGAATAATAC</u> <u>CACAGTTCCTTAC</u> <u>CAACAACAGATGAGAA</u> <u>AGATGATAC</u>                        |
| AtMYB80   | (1949) | <u>AGCTGGTAAGATAAAGATGGAT</u> <u>GTTTGGACCATGGGAATGGGATAA</u> <u>TGA-AG</u> <u>TTATGGG</u>                                |
| BnMYB80A  | (1899) | <u>AGCTGGTAAGATGAAATGGAT</u> <u>-----ATGGTAATGGGATAA</u> <u>TGA-AG</u> <u>CTATGGG</u>                                     |
| BnMYB80C  | (1799) | <u>AGCTGGTAAGATGAAATGGAT</u> <u>GTTTGGAGAA</u> <u>TGGTAATGGGATAA</u> <u>TGA-AG</u> <u>CTATGGG</u>                         |
| GhMYB80-1 | (1698) | <u>AGTTGAGAAGATCAA</u> <u>CTGAAT</u> <u>TAT</u> <u>----</u> <u>CAAGGGCTATACAA</u> <u>GAAACAGACAT</u> <u>GC</u> <u>TTC</u> |
| AtMYB80   | (2008) | <u>ACATGGGTAATGGAT</u> <u>TCTCATATGGATC</u> <u>CTCTTCGTCTTCGT</u> <u>TTGGGAATGA</u> <u>GAAAGAA</u>                        |
| BnMYB80A  | (1949) | <u>ACATGGGTAATGGAT</u> <u>TCTCGTATGGATCAT</u> <u>TTCCTCGTCC</u> <u>TTGGGAATGA</u> <u>GAAAGGA</u>                          |
| BnMYB80C  | (1858) | <u>ACATGGGGAATGGAT</u> <u>TCTCCTATGGATCT</u> <u>TTCGTATCGT</u> <u>TTGGGAATGA</u> <u>AGACAAAA</u>                          |
| GhMYB80-1 | (1754) | <u>CCTTGAA</u> <u>TAAACCATGGGAGT</u> <u>CTACTAGTAC</u> <u>AAGAGCAACAT</u> <u>CGGCTAATTT</u> <u>GAAGGG</u>                 |
| AtMYB80   | (2068) | <u>ATGATGGATCAGCGTCTCCTG</u> <u>CGGTGCGAGCTTGGAGGGGT</u> <u>CACGGAGGAATA</u> <u>-CGTACC</u>                               |
| BnMYB80A  | (2009) | <u>ACGAGGGATCCCGTCTCCTG</u> <u>CGGTGCGGCGTGGAGGGGT</u> <u>CACGGTGAATA</u> <u>-CGTACA</u>                                  |
| BnMYB80C  | (1918) | <u>ATGATGGAGCTGCGTCTCCTG</u> <u>CGGTGCGGCGTGGAGGGGT</u> <u>CACGGTGAATA</u> <u>-CGTACA</u>                                 |
| GhMYB80-1 | (1814) | <u>GTTGTGGTGT</u> <u>TTCCCTACATCTGT</u> <u>GACAGGATATCATCAT</u> <u>TATGGCCCATCAT</u> <u>CTTTTG</u>                        |
| AtMYB80   | (2127) | <u>CCGCTAGCTGAAACCGCGGCAGCGG</u> <u>AGGAGGAGG--AGAGAAGGAA</u> <u>-GCTGAAGGGAGAA</u>                                       |
| BnMYB80A  | (2068) | <u>TCAGTGGCTGAGACGGCGGCAGT</u> <u>GGAGGAGGAAAG--AGAGGAGGAA</u> <u>-GCTGAAGGGAGAA</u>                                      |
| BnMYB80C  | (1977) | <u>CCGCTAGCTGAAACCGCGGCAGCGG</u> <u>AGGAGGAGGAGG--AGAGGAGGAA</u> <u>-ATTGAAGGGAGAA</u>                                    |
| GhMYB80-1 | (1874) | <u>CCAA</u> <u>TGAAGGG</u> <u>CGCGTTCGGCTCA</u> <u>CCATGGAGCC</u> <u>AGAGTATG</u> <u>TGTACGGGAAGCA</u> <u>CAT</u>         |
| AtMYB80   | (2184) | <u>GTG</u> <u>----</u> <u>GTTGATCAAG--AGG--</u> <u>AGATTGGATCTGAA</u> <u>-GGAGGAAGAGGAGAT</u> <u>GGAAAT</u>               |
| BnMYB80A  | (2125) | <u>GTG</u> <u>----</u> <u>ATGGAAACAAG--AGG--</u> <u>AGATTGGATCTGAA</u> <u>-GGAGGAAGAGGAGAT</u> <u>GGAAAT</u>              |
| BnMYB80C  | (2034) | <u>GTG</u> <u>----</u> <u>GTGGACCAAG--AGG--</u> <u>AGAATGGATCTCAA</u> <u>-GGAGGAAGAGGAGAT</u> <u>GGAAAT</u>               |
| GhMYB80-1 | (1934) | <u>GTACCGCAGGGGAAACAAG</u> <u>TTAGGTCACATGAGAAAT</u> <u>TAAAGGATGAA</u> <u>AATGTTGAA</u> <u>GAAT</u>                      |
| AtMYB80   | (2234) | <u>GACGATGATGAGGAACCA</u> <u>-----TCATCATCATCAACATGTG</u> <u>TTTAAATGTGGATAAT</u> <u>GT</u>                               |
| BnMYB80A  | (2175) | <u>G</u> <u>---</u> <u>ATGATGAGGAGGCAACATGATCAACAT</u> <u>AGCAACATGC</u> <u>TTTAAATGTGGATAAC</u> <u>GA</u>                |
| BnMYB80C  | (2084) | <u>CTTGATGATGAGGAGCCAG</u> <u>CATGATCAACATCAACATCATGTG</u> <u>TTTAAATGTGGACAAT</u> <u>GT</u>                              |
| GhMYB80-1 | (1994) | <u>TTC</u> <u>-AAGGTGGAAA</u> <u>AA--ATT</u> <u>AAGAA</u> <u>TGCAACAAGCATA--TTCAATACAGAT</u> <u>TG</u> <u>T</u>           |
| AtMYB80   | (2288) | <u>CTTGTGGGATTTACAAGCTGATGATCT</u> <u>CATCAATCATATGGTT</u> <u>TGA</u> <u>-----</u>                                        |
| BnMYB80A  | (2232) | <u>CTTGTGGGATTTACAAGCTGATGATCT</u> <u>CATTAATCATATGGTT</u> <u>TGA</u> <u>-----</u>                                        |
| BnMYB80C  | (2144) | <u>CTTGTGGGATTTACAAGCTGATGATCT</u> <u>CATTAATCATGTGGTT</u> <u>TGA</u> <u>-----</u>                                        |
| GhMYB80-1 | (2049) | <u>GT</u> <u>TATGGGATATACCA</u> <u>TCTGATGATCTTATCAAC</u> <u>CCCTATTTATAG</u> <u>GAAAGCC</u> <u>TTAACAA</u>               |
| AtMYB80   | (2334) | -----                                                                                                                     |
| BnMYB80A  | (2278) | -----                                                                                                                     |
| BnMYB80C  | (2190) | -----                                                                                                                     |
| GhMYB80-1 | (2109) | CAAAAA <b>TAA</b>                                                                                                         |

**Supplementary Figure S1.** Nucleotide sequence alignment of MYB80 homologs from Arabidopsis (*AtMYB80*), canola (*BnMYB80A* and *BnMYB80C*) and cotton (*GhMYB80-1*). Yellow highlight represents the conserved nucleotides. Blue or green highlight represents the partially conserved nucleotides. The conserved *cis*-elements in the promoters are boxed, including the W-box (TTGAC), MYB element (A/TACC), GTGANTG10 element (TCAC), DOFCOREZM binding site (A/TAAAG). The putative two MYB bind sites targeted for mutagenesis are underlined. The translation start and stop codon are in bold letters.
