# Supplementary material for: MYB80 homologues in Arabidopsis, cotton and Brassica: regulation and functional conservation in tapetal and pollen development
Source: PubMed Central journal article supplement (PMC4205283; doi:10.1186/s12870-014-0278-3), 2014-10-14
Supplement: 12870_2014_278_MOESM2_ESM.pdf [file 12870_2014_278_MOESM2_ESM.pdf]

**Supplementary Table S1.** Summary of GUS activities in the transgenic lines possessing the *AtMYB80* promoter-*GUS* deletion constructs.

| <b>Construct</b>     | <b>Line number</b> | <b>GUS expression</b> |
|----------------------|--------------------|-----------------------|
| <i>pPG</i>           | 1                  | strong                |
|                      | 2                  | strong                |
|                      | 3                  | moderate              |
|                      | 4                  | moderate              |
| <i>1651-pBI101.1</i> | 1                  | strong                |
|                      | 2                  | moderate              |
|                      | 3                  | moderate              |
|                      | 4                  | strong                |
|                      | 5                  | moderate              |
|                      | 6                  | moderate              |
| <i>284-pBI101.1</i>  | 1                  | weak                  |
|                      | 2                  | moderate              |
|                      | 3                  | weak                  |
|                      | 4                  | weak                  |
|                      | 5                  | weak                  |
|                      | 6                  | weak                  |
| <i>256-pBI101.1</i>  | 1                  | very weak             |
|                      | 2                  | very weak             |
|                      | 3                  | very weak             |
| <i>240-pBI101.1</i>  | 1                  | not detected          |
|                      | 2                  | not detected          |
|                      | 3                  | not detected          |
|                      | 4                  | not detected          |
