# Supplementary material for: MYB80 homologues in Arabidopsis, cotton and Brassica: regulation and functional conservation in tapetal and pollen development
Source: PubMed Central journal article supplement (PMC4205283; doi:10.1186/s12870-014-0278-3), 2014-10-14
Supplement: 12870_2014_278_MOESM3_ESM.pdf [file 12870_2014_278_MOESM3_ESM.pdf]

|        |        |                            | MYB1                     | MYB2            |                              |                       |                 |                      |                        |                   |
|--------|--------|----------------------------|--------------------------|-----------------|------------------------------|-----------------------|-----------------|----------------------|------------------------|-------------------|
| pAt80  | (-281) | GCA---CATCTGATGCTAATTTTACT | <u>AT-GTTT</u>           | CATT            | <u>TTTGTIA</u> -ATCAATTTTAT- |                       |                 |                      |                        |                   |
| pBn80A | (-256) | GCA---CATTTGATGCTAATTC     | <u>ATCGTTT</u>           | TAATT           | <u>CTTTTAT</u> -----         |                       |                 |                      |                        |                   |
| pBn80C | (-227) | GCA---CATTTGATGCTACTTC     | <u>ATCGTTT</u>           | CAATT           | <u>TTTGTTT</u> -----ATT----- |                       |                 |                      |                        |                   |
| pGh80  | (-288) | GGATGTC                    | <u>TTTT</u>              | CATGC           | <u>CATATA</u>                | IGCAAT                | <u>ATC</u> -TTT | CCCC                 | <u>TTTGTATATAAATAA</u> | TATACC            |
| pTa80  | (-237) | CAGCGC                     | CCGCCCC                  | GC              | CCTTCC                       | CGCGCGCGCG            | CCGCACGCC       | ACA                  | --CGACCGCGCG           | C-                |
| pOs80  | (-165) | CC---                      | CGT                      | GC              | GC                           | CGCGCGCGCGCC          | ACTCG           | CCGGCGCG             | GCA                    | G-----CGCGCGC-    |
|        |        |                            |                          |                 |                              |                       |                 |                      |                        |                   |
| pAt80  | (-227) | TATAT                      | <u>ATATACATACATTC</u>    | <u>CTTCTTC</u>  | TTTT                         | <u>GCAATTTAAA</u>     | ---             | <u>GCCTTGATTACAA</u> |                        |                   |
| pBn80A | (-217) | ---                        | <u>AAGTATGCATACATTTT</u> | <u>CTTCTTC</u>  | CAGTTT                       | <u>CAATTTAATA</u>     | ---             | <u>GTCTCGATTACAA</u> |                        |                   |
| pBn80C | (-185) | ---                        | <u>ATATATATA</u>         | <u>CACATTTT</u> | <u>CTTCTTC</u>               | <u>CTTTACAATTTAAA</u> | ---             | <u>GCCACGATTACAA</u> |                        |                   |
| pGh80  | (-229) | TTAACAA                    | <u>AATAAA</u>            | ATG             | AACACC                       | CCCAAA                | C               | <u>ATTTCTCACTT</u>   | CCCCCGCC               | <u>CTTTTTTCTT</u> |
| pTa80  | (-180) | CCCGCAC                    | <u>TATATATA</u>          | CTTC            | CAGCGCG                      | CCGGCGGAT             | GCAAGC          | ---                  | <u>GCCG</u>            | -----CAC          |
| pOs80  | (-116) | GC-G                       | CGCGCG                   | GGG             | GGT                          | CG                    | GAGCC           | <u>TATTTATAA</u>     | ---                    | CACGGCG--CGC      |

**Supplementary Figure S3.** Partial promoter sequences alignment of the *MYB80* homologs from Arabidopsis (*pAt80*), canola (*pBn80A* and *pBn80C*), cotton (*pGh80*), wheat (*pTa80*) and rice (*pOs80*). The putative two MYB binding sites are underlined and the putative TATA boxes are indicated.
