# Supplementary material for: MYB80 homologues in Arabidopsis, cotton and Brassica: regulation and functional conservation in tapetal and pollen development
Source: PubMed Central journal article supplement (PMC4205283; doi:10.1186/s12870-014-0278-3), 2014-10-14
Supplement: 12870_2014_278_MOESM4_ESM.pdf [file 12870_2014_278_MOESM4_ESM.pdf]

**Supplementary Table S2.** GUS activities in the *atmyb80* mutant lines possessing the *AtMYB80* promoter-*GUS* construct. Heter, heterozygous *atmyb80* mutant; Homo, homozygous *atmyb80* mutant.

| <b>Line number</b> | <b><i>atmyb80</i> mutant</b> | <b>GUS activities in anther by developmental stages</b> |
|--------------------|------------------------------|---------------------------------------------------------|
| 2                  | Heter                        | 5 - 9                                                   |
| 4                  | Heter                        | 5 - 9                                                   |
| 5                  | Heter                        | 5 - 9                                                   |
| 6                  | Heter                        | 5 - 9                                                   |
| 7                  | Heter                        | 5 - 9                                                   |
| 8                  | Heter                        | 5 - 9                                                   |
| 9                  | Heter                        | 5 - 9                                                   |
| 13                 | Heter                        | 5 - 9                                                   |
| 10                 | Homo                         | 5 – 13                                                  |
| 14                 | Homo                         | 5 – 13                                                  |
