# Supplementary material for: MYB80 homologues in Arabidopsis, cotton and Brassica: regulation and functional conservation in tapetal and pollen development
Source: PubMed Central journal article supplement (PMC4205283; doi:10.1186/s12870-014-0278-3), 2014-10-14
Supplement: 12870_2014_278_MOESM5_ESM.pdf [file 12870_2014_278_MOESM5_ESM.pdf]

**Supplementary Table S3.** Comparison of anther development stages (3 to 11) between *Arabidopsis* and *G. hirsutum*. Sizes (length and width) of the selected *G. hirsutum* floral buds corresponding to each anther developmental stage are indicated.

| Stages | Arabidopsis<br>(Sanders <i>et al.</i> , 1999)                                                                           | <i>G. hirsutum</i>                                                                                             | <i>G. hirsutum</i> floral bud sizes |             |
|--------|-------------------------------------------------------------------------------------------------------------------------|----------------------------------------------------------------------------------------------------------------|-------------------------------------|-------------|
|        |                                                                                                                         |                                                                                                                | Length (mm)                         | Width (mm)  |
| 3      | The primary parietal and sporogenous layers generate the secondary parietal layers and sporogenous cells, respectively. | The secondary parietal layers and cells are apparent.                                                          | 4.2 – 4.4                           | 2.3 – 2.4   |
| 4      | Four-lobed anther pattern with two developing stomium regions generated. Vascular region initiated.                     | Formation of the epidermis, endothecium, middle layer and tapetum has been initiated. Vascular region appears. | 4.4 – 4.8                           | 3.2 – 3.5   |
| 5      | Four defined locules established. Microspore mother cells appear.                                                       | The microspore mother cells appear.                                                                            | 6.4 – 6.5                           | 4.1 – 4.2   |
| 6      | Microspore mother cells enter meiosis. Middle layer is crushed and degenerates. Tapetum becomes vacuolated.             | Microspore mother cells commence meiosis and the tapetal cells become vacuolated.                              | 7.3 – 7.6                           | 4.3 – 4.5   |
| 7      | Meiosis completed. Tetrads of microspores free within each locule. Remnants of middle layer present.                    | The tapetal cytoplasm is condensed and tetrads appear in the anther locules.                                   | 8.6 – 8.8                           | 5.3 – 5.6   |
| 8      | Callose wall surrounding tetrads degenerates and individual microspores released.                                       | Microspores are released from the tetrads. The tapetal cell walls have been degraded.                          | 9.7 – 9.9                           | 6.2 – 6.4   |
| 9      | Microspores generate an exine wall and become vacuolated.                                                               | <b>Degeneration of tapetal layer appears to commence.</b> Microspores are vacuolated.                          | 10.5 – 10.6                         | 6.8 – 7.1   |
| 10     | <b>Tapetum degeneration initiates.</b> Less vacuolated microspores exist.                                               | The tapetum has been degraded. Remnants of tapetal cells visible. The microspores are still vacuolated.        | 12.4 – 12.8                         | 7.5 – 7.8   |
| 11     | Pollen mitotic divisions occur. Tapetum and septum cell degeneration initiates. Stomium differentiation begins.         | Early pollen grains appear.                                                                                    | 17.1 – 17.5                         | 10.4 – 10.8 |
