# Supplementary material for: MYB80 homologues in Arabidopsis, cotton and Brassica: regulation and functional conservation in tapetal and pollen development
Source: PubMed Central journal article supplement (PMC4205283; doi:10.1186/s12870-014-0278-3), 2014-10-14
Supplement: 12870_2014_278_MOESM6_ESM.pdf [file 12870_2014_278_MOESM6_ESM.pdf]

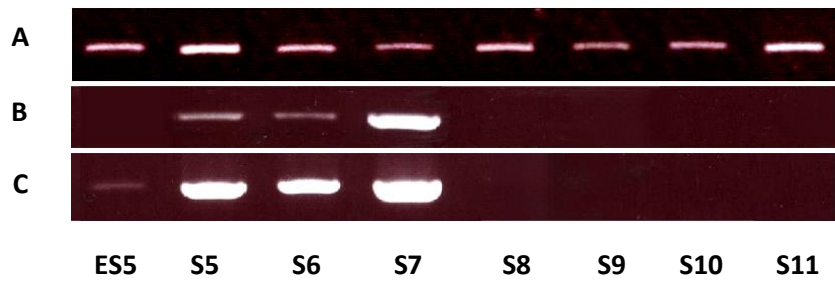

**Supplementary Figure S2.** Expression analyses of *GhMYB80* in *G. hirsutum* anther using semi-quantitative RT-PCR. A. Transcript of the *G. hirsutum*  $\beta$ -tubulin reference gene (26 cycles). B. Transcript of *GhMYB80* at 26 cycles. C. Transcript of *GhMYB80* at 28 cycles. ES5, early stage 5; S5 to S11, stages 5 to 11.
