# Supplementary material for: MYB80 homologues in Arabidopsis, cotton and Brassica: regulation and functional conservation in tapetal and pollen development
Source: PubMed Central journal article supplement (PMC4205283; doi:10.1186/s12870-014-0278-3), 2014-10-14
Supplement: 12870_2014_278_MOESM7_ESM.pdf [file 12870_2014_278_MOESM7_ESM.pdf]

**Supplementary Table S4.** Plant fertility (percentage of the elongated siliques versus the total siliques) and number of the  $P_{Gh80}:Gh80-32R2$  and  $P_{Gh80}:Gh80MD-32R2$  transgenic lines.

| <b>Plant fertility (%)</b> | <b><math>P_{Gh80}:Gh80-32R2</math></b> | <b><math>P_{Gh80}:Gh80MD-32R2</math></b> |
|----------------------------|----------------------------------------|------------------------------------------|
| 0                          | 0                                      | 0                                        |
| <25                        | 12                                     | 30                                       |
| 25-75                      | 15                                     | 31                                       |
| >75                        | 14                                     | 2                                        |
