# Supplementary material for: MYB80 homologues in Arabidopsis, cotton and Brassica: regulation and functional conservation in tapetal and pollen development
Source: PubMed Central journal article supplement (PMC4205283; doi:10.1186/s12870-014-0278-3), 2014-10-14
Supplement: 12870_2014_278_MOESM8_ESM.pdf [file 12870_2014_278_MOESM8_ESM.pdf]

**Supplementary Table S5.** Primer sequences used in this article. Nucleotide sequences are in the 5' to 3' order.

| Name                       | Nucleotide sequence                                                                                                      |
|----------------------------|--------------------------------------------------------------------------------------------------------------------------|
| <b>Gene cloning</b>        |                                                                                                                          |
| Br80F1                     | GCGTTTCTTGATGCGTGCTA                                                                                                     |
| Br80F2                     | AGCCTAAAAGGCTAGAGTTC                                                                                                     |
| Br80F3                     | AGGAATACGTTCTGACG                                                                                                        |
| Br80F4                     | GGATATACAAGGAGTTGACCA                                                                                                    |
| Br80R1                     | TCAAACCATATGATTAATGAGATCATCAGC                                                                                           |
| Br80R2                     | CATTCTTTTCTTTTCTTTTCTAGTTTTATCTCGA                                                                                       |
| Gh80PF1                    | CACCAAAACCCATTTTAACTGTAATAAATC                                                                                           |
| Gh80PF3                    | CACCAGTTGAAACATTGGAAGGGTT                                                                                                |
| Gh80SR2                    | GCCTACATTATTATTTTTTGTGTTAAAGGCTT                                                                                         |
| <b>Vector construction</b> |                                                                                                                          |
| At80-1651 F                | AGCAAGCTTCTTCTCCTTCTTCTCGGGATTACTC                                                                                       |
| At80-1105 F                | AGCAAGCTTGGGCAAGGAGCTTCTATGGCCAA                                                                                         |
| At80-284 F                 | ACGAAGCTTATGCACATCTGATGCTAATTTTTA                                                                                        |
| At80-256 F                 | ATTAAGCTTTGTTTTTCATTTTTGTAAATCAAT                                                                                        |
| At80-240 F                 | AGCAAGCTTAAATCAATTTTATTATATATATAC                                                                                        |
| 103+35 R                   | CGAGGATCCAGGAGTCCATTGTCCTCTCTTC                                                                                          |
| M1-1                       | CATCTGATGCTAATTTTTACTATTTTTTCATTTTTGTAAATCAATTT                                                                          |
| M2-2                       | CATCTGATGCTAATTTTTACTATTTTTTCATTTTTTTAAATCAATTTTAT<br>TATATATAT                                                          |
| At80P-TF                   | CACCGGCAAGGAGCTTCTATGGCCAA                                                                                               |
| At80P-Gh                   | CTTCTCACAAACATGGAATCCGACCCATTTCTTCTTTCTTTCTTAG                                                                           |
| Gh80-F1                    | ATGGGTCCGATTCCATGTTGTGAG                                                                                                 |
| Gh32R                      | TTAAGGAGGACTTATTCTTAGCTCCAGATTTAAGTCCAAACCTGGTGG<br>CTGATCCTGAGTTCAAGGTTCAAATCTAATCCTTTTTTGTGTTAAAGGC<br>TTCTC           |
| GhMD32R                    | TTAAGGAGGACTTATTCTTAGCTCCAGATTTAAGTCCAAACCTGGTGG<br>CTGATCCTGAGTTCAAGGTTCAAATCTAATCCATCGATACGTTTCTTAG<br>TTAGCAGGTGG     |
| At80MP-F                   | GATCCGGTGACCCACAAGCCTCTAAACCAAATCAACTTTTCAAACC                                                                           |
| At80MP-R                   | AGGCTTGTGGGTCACCGGATC                                                                                                    |
| At80MD-R                   | TCAGTCAACACGTTTCTTGGTGAGCAA                                                                                              |
| Bn80-F1                    | ATGGATCCTCACGTGGGGGTCCTGTAATTGAC                                                                                         |
| Bn80-F2                    | ATGGATCCGAAGTCTCAAACGTAAATGCGT                                                                                           |
| Bn80-F3                    | ATGGATCCTGATTCAACCCCTAATGTAAACTG                                                                                         |
| Bn80-R1                    | TCTTCTTTCTAGTTTTTATCTCTC                                                                                                 |
| Bn80-32R                   | CAGTAAGCTTTTAAGGAGGACTTATTCTTAGCTCCAGATTTAAGTCCAA<br>ACCAACCACATGATTAATGAGATC                                            |
| Bn80-32R2                  | TGACAAGCTTTTAAGGAGGACTTATTCTTAGCTCCAGATTTAAGTCCAA<br>ACCTGGTGGACTGATCCTGAGTTCAAGGTTCAAATCTAATCCAACCACA<br>TGATTAATGAGATC |
| <b>RT-PCR/qPCR</b>         |                                                                                                                          |
| Gh80-F1                    | ATGGGTCCGATTCCATGTTGTGAG                                                                                                 |
| Gh80-R3                    | TGTAGTGGCTATCTCAGCCATGAGGTGAGA                                                                                           |
| qAt80-F                    | CTCCATCTTGTCCTTCGTTTG                                                                                                    |
| qAt80-R                    | GGTCTGGCGGGATGCCTTCC                                                                                                     |
| qGh80-F                    | TAATTACCTTCGGCCGGACC                                                                                                     |
| qGh80-R                    | TCCGACCAGGTAACCTGTGCT                                                                                                    |
| GhTUB-F                    | CAGGTATGCCATTCTTTGGGAGG                                                                                                  |

---

|           |                            |
|-----------|----------------------------|
| GhTUB-R   | CGGGATCCATTCAACAAAGTAAGA   |
| GhUBQ-F   | CTCCATCTTGCCTTCGTTTG       |
| GhUBQ-R   | GGTCTGGCGGGATGCCTTCC       |
| UBQ-F     | TCCGGATCAGCAGAGGCTTA       |
| UBQ-R     | TCAGAACTCTCCACCTCAAG       |
| At80En-F  | GAGGAGGAGGAGAGAAGGAA       |
| At80En-R  | CATCAGCTTGTAATCCCAC        |
| At80SR1   | CCAAATAAAAATCAAACCATATG    |
| qMP-LV    | CACAAGCCTCTAAACCAAATCAACTT |
| At80R2    | ACCCATGTCCATAAATTTCATTATC  |
| At80CNS-F | TTCTCGCATCTAATGGCAGAG      |
| At80MD-RT | GCGCGCCCACCCTTTCAGTCAAC    |

---
